# Supplementary material for: Secretome profiling of Propionibacterium freudenreichii reveals highly variable responses even among the closely related strains
Source: PubMed Central journal article supplement (PMC5902329; doi:10.1111/1751-7915.13254), 2018-02-28
Supplement: MBT2-11-510-s001.pdf [file MBT2-11-510-s001.pdf]

Fig. S1

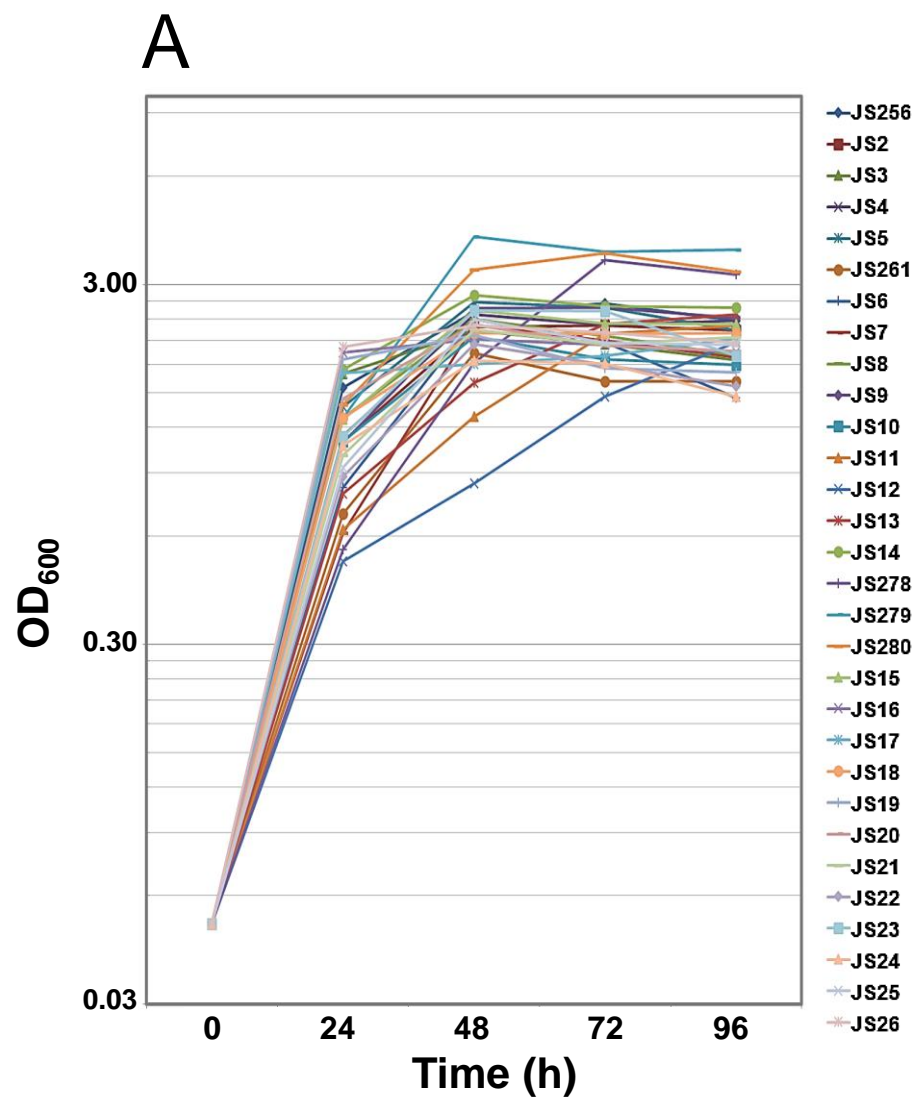

**B**

| Strain | Species | Origin   | Harvest time (h) | OD <sub>600</sub> |
|--------|---------|----------|------------------|-------------------|
| JS256  | PFR     | Dairy    | 24               | 1.8               |
| JS2    | PFR     | Dairy    | 24               | 1.2               |
| JS3    | PFR     | Dairy    | 21               | 1.4               |
| JS4    | PFR     | Dairy    | 24               | 1.0               |
| JS5    | PFR     | Dairy    | 24               | 1.3               |
| JS261  | PFR     | Dairy    | 24               | 1.0               |
| JS6    | PFR     | Dairy    | 24               | 1.1               |
| JS7    | PFR     | Dairy    | 24               | 1.1               |
| JS8    | PFR     | Dairy    | 24               | 1.7               |
| JS9    | PFR     | Dairy    | 24               | 1.1               |
| JS10   | PFR     | Dairy    | 24               | 1.6               |
| JS11   | PFR     | Cereal   | 48               | 0.9               |
| JS12   | PFR     | Cereal   | 72               | 1.5               |
| JS13   | PFR     | Cereal   | 48               | 1.0               |
| JS14   | PFR     | Cereal   | 24               | 1.2               |
| JS278  | AAP     | Cereal   | 48               | 1.6               |
| JS279  | AAP     | Cereal   | 24               | 1.6               |
| JS280  | AAP     | Cereal   | 24               | 1.5               |
| JS15   | PFR     | DSM4902  | 24               | 1.2               |
| JS16   | PFR     | DSM20271 | 18               | 1.2               |
| JS17   | PFR     | Dairy    | 18               | 0.8               |
| JS18   | PFR     | Dairy    | 24               | 1.2               |
| JS19   | PFR     | Dairy    | 18               | 0.8               |
| JS20   | PFR     | Dairy    | 24               | 0.9               |
| JS21   | PFR     | Dairy    | 24               | 0.8               |
| JS22   | PFR     | Dairy    | 24               | 1.6               |
| JS23   | PFR     | Dairy    | 24               | 1.4               |
| JS24   | PFR     | Dairy    | 24               | 1.4               |
| JS25   | PFR     | Dairy    | 24               | 0.9               |
| JS26   | PFR     | Dairy    | 18               | 1.3               |
