# Supplementary material for: Secretome profiling of Propionibacterium freudenreichii reveals highly variable responses even among the closely related strains
Source: PubMed Central journal article supplement (PMC5902329; doi:10.1111/1751-7915.13254), 2018-02-28

Fig. S3

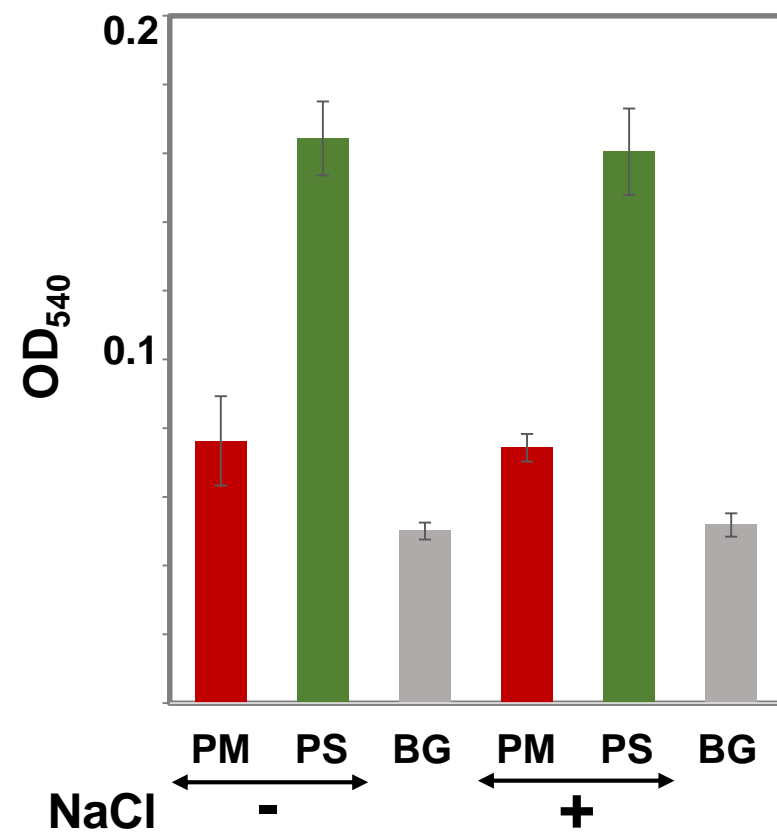

Supplement: MBT2-11-510-s003.pdf [file MBT2-11-510-s003.pdf]
