# Supplementary material for: Secretome profiling of Propionibacterium freudenreichii reveals highly variable responses even among the closely related strains
Source: PubMed Central journal article supplement (PMC5902329; doi:10.1111/1751-7915.13254), 2018-02-28
Supplement: MBT2-11-510-s004.pdf [file MBT2-11-510-s004.pdf]

*P. freudenreichii* ITG P20, InIA (CDP49497)

|             |             |             |            |            |             |      |
|-------------|-------------|-------------|------------|------------|-------------|------|
| MQALQGRRRS  | RRVMAAAVAA  | LTAMTVLPSQ  | LNAVAAPTD  | FATTMPDAAL | RGCVTALNL   | 60   |
| DSTAAPTSQ   | LATVTSLS    | GKGVADLTGI  | SALPNLGKLF | LGNNSLTSLA | PLATSTKVSS  | 120  |
| LDVSSNQLSD  | ITPTANLKAL  | VSVNVANNRL  | RDLSPSTLP  | NLGGLSITSN | SQKAVGAPAT  | 180  |
| SGQATAVPTA  | IDKTGTVFKA  | EAPSGVTVSG  | ATVTYPIAGT | YDWSFKDQSL | YFNGTITVTV  | 240  |
| SAASGV TIPD | AGLRGCINDK  | LALAPDATPT  | QDQLASITDL | SCVNKGVTDL | TGISQLGSLK  | 300  |
| NLTLSTNKIS  | DLTPLTPLTG  | LESLILTGNS  | VADVSPLTSL | QNLAALTLDR | NNVLTNLGLG  | 360  |
| YLPKLATLSA  | SSQFKNEGRT  | RLASIAGLDK  | LTGLTSLAIN | NTDVSDLTPV | TGLSGLTRLS  | 420  |
| ATNSQISSAA  | PLAALGRLTA  | LDLSGNHISD  | ISPLNKLDMT | LNAMRVTGQT | LAAPEAKASV  | 480  |
| ATDAPGV TAL | DGSILVAVPP  | AGLTVNDAKV  | TYASPGDYTW | TFEEKTPGSY | PRTFFSGKIT  | 540  |
| QRATDAPPAV  | VGVDIPDTNF  | RTCLAGLLNH  | SDPAAPISAD | ELAGLTSVIC | VGKISISNLTG | 600  |
| AANLTGATEL  | ILSTNSISDV  | TPLRGLTQLQ  | KLYLPGNKIS | DPAPLSSLTN | LNELLLGQNO  | 660  |
| VTSISALSPL  | AGLTLEISQ   | KYDKNGNTGL  | TSLDGVQHMS | SLKALTANNS | RISDLAPLKD  | 720  |
| LHELSSLYLN  | NNSVNDLTAL  | SGLTALEKLG  | LSNNNISSVT | PLASLTKLSR | IDIGNHLM    | 780  |
| LSPLGSTAID  | ATFNLNANNQ  | ATHLATVPVG  | LTTSVPQPRD | MKGAIVPVTP | PAGLTITDGT  | 840  |
| VTYPKSGTYS  | FTWTSSTGEG  | GKSFSGSVDQ  | EVGAAVIGAA | NVPDAALRSC | LASAAGLDAT  | 900  |
| ASPTVDQLKA  | LTTVKCASKG  | ITNLTGVENL  | TAATTIDLSN | TLADVTPLAG | LDKLATLNL   | 960  |
| HTGLSSLTTV  | SALPALTALT  | ISGNPITDLS  | ALKAKTGLVL | QATDMTGSAP | DVKGGVASDV  | 1020 |
| PTAFDATGTS  | VPLGAPAGAT  | VANGKVITYTA | AGSYSWPFTT | TGGAFSGTIT | QKVTSDATDP  | 1080 |
| DANKGAQACV  | QAGNVVVVVE  | RDTGLQKGGC  | ATKFSTGTEA | LTSAGFTTDN | PTFVGKIDGY  | 1140 |
| PATAPVDDPG  | HYSYWTYWHG  | VSADPTATTQ  | TYPWTFSEVG | LGDYHPRAGS | VEGWRFVNL   | 1200 |
| GSTDKVPAPS  | FVLSYTN GAS | PSPTTPPVAC  | TMSYPDVPSS | MAFSDDICWL | TQHKIATGWP  | 1260 |
| DGTFRPVTPL  | NRDAMVAFLY  | RMAGSPAFTP  | TRQTFDQVDA | GNMFFKQIEW | AASNGIVTGW  | 1320 |
| PDGTFRP TQP | ITRDAIAALI  | YRQAGSPAVT  | LPDRPSFNDV | SPTTMFYREI | EWMQAKGIAN  | 1380 |
| GWADGSYRPL  | NDTNRDAIAA  | FLHRATDQGV  | LALH       |            |             | 1414 |

Nominal mass, 146 kDa
